# Supplementary material for: Antitumor activity of dual blockade of PD-L1 and MEK in NSCLC patients derived three-dimensional spheroid cultures
Source: Springer Nature journal article supplement (doi:10.1186/s13046-019-1257-1), 2019-06-13

Supplemental figure 1: MTT assay on KRAS-mutated patients

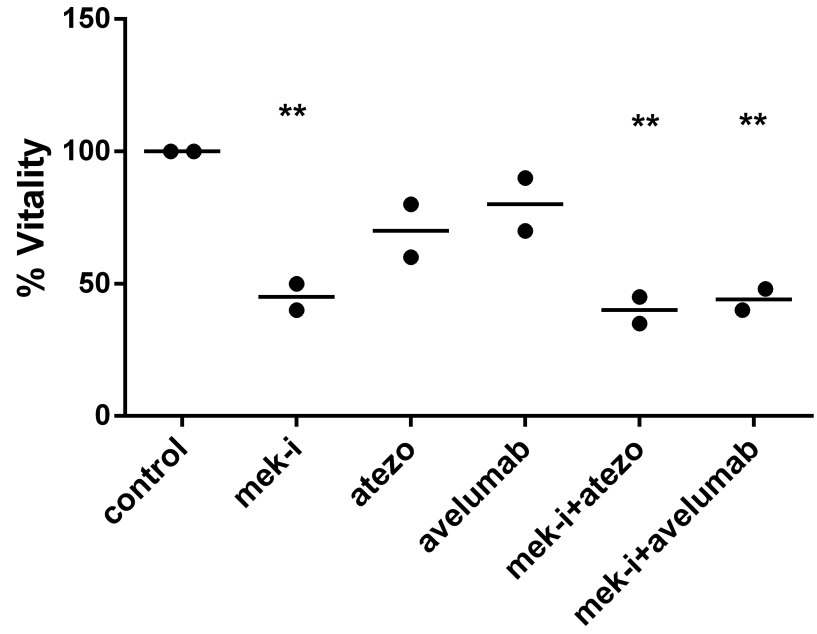

Supplement: MOESM1 [file 16807800]
